## Research Article

# RNA-sequencing and bioinformatics analysis of long noncoding RNAs and mRNAs in the asthenozoospermia

Hui Lu<sup>1,2,3,4,5,\*</sup>, Dongchuan Xu<sup>6,\*</sup>, Ping Wang<sup>1,2,3,4,5</sup>, Wenye Sun<sup>1,2,3,4,5</sup>, Xinhuai Xue<sup>1,2,3,4,5</sup>, Yuxin Hu<sup>7</sup>, Chunli Xie<sup>1,2,3,4,5</sup> and  Yanlin Ma<sup>1,2,3,4,5</sup>

<sup>1</sup>Hainan Provincial Key Laboratory for human reproductive medicine and Genetic Research, The First Affiliated Hospital of Hainan Medical University, Haikou 570102, Hainan, China; <sup>2</sup>Department of Reproductive Medicine, The First Affiliated Hospital of Hainan Medical University, Haikou 570102, Hainan, China; <sup>3</sup>Hainan Provincial Clinical Research Center for Thalassemia, The First Affiliated Hospital of Hainan Medical University, Haikou 570102, Hainan, China; <sup>4</sup>Key Laboratory of Tropical Translational Medicine of Ministry of Education, Hainan Medical University, Haikou 570102, Hainan, China; <sup>5</sup>Haikou Key Laboratory for Preservation of Human Genetic Resource, The First Affiliated Hospital of Hainan Medical University, Haikou 570102, Hainan, China; <sup>6</sup>Department of Emergency, Hainan General Hospital, Haikou 570311, Hainan, China; <sup>7</sup>Division of Biological Sciences, University of California, San Diego, California 92093, U.S.A.

**Correspondence:** Yanlin Ma (mayanlinma@hotmail.com)

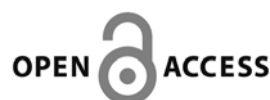

Asthenozoospermia is one of the major causes of human male infertility. Long noncoding RNAs (lncRNAs) play critical roles in the spermatogenesis processes. The present study aims to investigate the intricate regulatory network associated with asthenozoospermia. The lncRNAs expression profile was analyzed in the asthenozoospermia seminal plasma exosomes by RNA-sequencing, and the functions of differentially expressed genes (DEGs) were analyzed by Gene Ontology (GO) and Kyoto Encyclopedia of Genes and Genomes (KEGG) pathway and DO (Disease Ontology) enrichment analyses. Pearson's correlation test was utilized to calculate the correlation coefficients between lncRNA and mRNAs. Moreover, the lncRNA-miRNA-mRNA co-expression network was constructed with bioinformatics. From the co-expression analyses, we identified the cis regulated correlation pairs lncRNA-mRNA. To confirm sequencing results with five of the identified DElncRNAs were verified with quantitative reverse-transcription polymerase chain reaction (qRT-PCR). We identified 4228 significantly DEGs, 995 known DElncRNAs, 2338 DEmRNAs and 11,706 novel DElncRNAs between asthenozoospermia and normal group. GO and KEGG analyses showed that the DEGs were mainly associated with metabolism, transcription, ribosome and channel activity. We found 254,981 positive correlations lncRNA-mRNA pairs through correlation analysis. The detailed lncRNA-miRNA-mRNA regulatory network included 11 lncRNAs, 35 miRNAs and 59 mRNAs. From the co-expression analyses, we identified 7 cis-regulated correlation pairs lncRNA-mRNA. Additionally, the qRT-PCR analysis confirmed our sequencing results. Our study constructed the lncRNA-mRNA-miRNA regulation networks in asthenozoospermia. Therefore, the study findings provide a set of pivotal lncRNAs for future investigation into the molecular mechanisms of asthenozoospermia.

\*These authors contributed equally to this work.

Received: 20 November 2019

Revised: 15 May 2020

Accepted: 01 June 2020

Accepted Manuscript online:  
03 July 2020

Version of Record published:  
15 July 2020

## Introduction

Infertility is a worldwide health problem, affecting approximately 15% of couples with child-bearing age, and male factor has been deemed to 50% causes for infertility [1]. The main cause of male infertility is sperm quality loss displaying azoospermia, oligozoospermia, asthenozoospermia and teratospermia. In these cases, asthenozoospermia is one of the major causes of human male infertility, characterized by reduced forward motility of spermatozoa (grade A + B sperm motility < 50% or A < 25%), which prevents

**Table 1 Basic characteristics and sperm parameters of cases and controls**

| Variables                             | Case (n=5)   | Control (n=5) | P      | Case (n=20) | Control (n=20) | P      |
|---------------------------------------|--------------|---------------|--------|-------------|----------------|--------|
| Age                                   | 32.8 ± 6.53  | 32.4 ± 5.32   | 0.918  | 35 ± 6.22   | 34.7 ± 5.38    | 0.871  |
| BMI                                   | 24.8 ± 2.69  | 25.1 ± 3.32   | 0.884  | 25.3 ± 3.2  | 25.6 ± 4.15    | 0.816  |
| Smoking                               |              |               | 0.490  |             |                | 0.736  |
| Yes                                   | 3 (60%)      | 4 (80%)       |        | 14 (70%)    | 13 (65%)       |        |
| No                                    | 2 (40%)      | 1 (20%)       |        | 6 (30%)     | 7 (35%)        |        |
| Drinking                              |              |               | 1.000  |             |                | 1.000  |
| Yes                                   | 4 (80%)      | 4 (80%)       |        | 15 (75%)    | 15 (75%)       |        |
| No                                    | 1 (20%)      | 1 (20%)       |        | 5 (25%)     | 5 (25%)        |        |
| Sperm volume (ml)                     | 3.0 ± 0.73   | 4.8 ± 1.28    | 0.024  | 2.8 ± 0.8   | 3.7 ± 1.66     | 0.041  |
| pH                                    | 7.7 ± 0.16   | 7.7 ± 0.19    | 0.613  | 7.5 ± 0.47  | 7.7 ± 0.17     | 0.083  |
| Sperm density (× 10 <sup>6</sup> /ml) | 13.9 ± 11.44 | 59.6 ± 16.58  | 0.001  | 13.8 ± 14   | 55.6 ± 13.57   | <0.001 |
| PR                                    | 0.1 ± 0.05   | 0.5 ± 0.04    | <0.001 | 0.1 ± 0.07  | 0.6 ± 0.04     | <0.001 |
| IM                                    | 0.9 ± 0.07   | 0.3 ± 0.13    | <0.001 | 0.9 ± 0.1   | 0.4 ± 0.02     | <0.001 |
| NP                                    | 0 ± 0.04     | 0.1 ± 0.16    | 0.236  | 0 ± 0.05    | 0.1 ± 0.02     | 0.430  |
| Sperm activity rate                   | 0.1 ± 0.07   | 0.6 ± 0.02    | <0.001 | 0.1 ± 0.1   | 0.6 ± 0.03     | <0.001 |

Abbreviations: IM, inactive sperm rate; NP, non-progressive motility; PR, progressive motility.  
P < 0.05 was considered statistically significant.

**Table 2 The differentially expressed genes between asthenozoospermia and normal (top 10)**

| No.   | Up-regulated |          |          | Down-regulated |           |          |
|-------|--------------|----------|----------|----------------|-----------|----------|
|       | Gene         | logFC    | P-value  | Gene           | logFC     | P-value  |
| 1     | AC009965.1   | 9.767628 | 2.61E-08 | RN7SL2         | -10.80410 | 2.43E-12 |
| 2     | AL589843.2   | 9.334522 | 4.12E-07 | HMG1P28        | -8.382749 | 5.20E-08 |
| 3     | AC004853.2   | 8.941995 | 3.76E-07 | AC027309.2     | -8.141726 | 2.39E-07 |
| 4     | AC108751.5   | 8.748432 | 3.08E-06 | AC008021.1     | -8.061548 | 0.003452 |
| 5     | AC010615.1   | 8.698275 | 2.72E-07 | AC011444.3     | -7.130734 | 3.80E-07 |
| 6     | AC121764.1   | 8.650715 | 1.19E-06 | AC009093.4     | -6.598787 | 5.26E-06 |
| 7     | AL138688.2   | 8.633034 | 4.21E-07 | AL359771.1     | -6.485628 | 3.13E-06 |
| 8     | MTCO1P21     | 8.493677 | 2.92E-07 | AL109933.3     | -6.389374 | 9.01E-05 |
| 9     | AL358234.1   | 8.473512 | 5.91E-07 | AL121906.2     | -6.347108 | 5.36E-05 |
| 10    | AC019117.2   | 8.350703 | 1.60E-06 | AC019193.3     | -6.305771 | 3.27E-07 |
| Total | 2344         |          |          | 1884           |           |          |

Abbreviation: FC, fold change  
P < 0.05 was considered statistically significant (asthenozoospermia vs. normal group).

the sperm from moving to the egg and penetrating it, eventually leading to infertility [2]. However, the cause and pathogenesis of asthenozoospermia are not completely understood.

Exosomes are nanosized extracellular vesicles (40–180 nm) that can be released by almost all types of cells and exist stably in various biological fluids (e.g. blood, urine, saliva, seminal and follicular) [3]. The importance of exosomes lies in their role in intercellular communication by transmitting bioactive molecules, including proteins, DNA, mRNAs and non-coding RNAs. Exosomes could transfer information to recipient cells and thereby influencing the cell functions [4]. These unique properties make exosomes a potential candidate as reliable biomarkers. The recent studies have shown that exosomes are secreted along the male reproductive tract and are thought to be involved in spermatozoa maturation and function [5,6]. Murdica et al. [7] have reported that seminal plasma of men with severe asthenozoospermia contains exosomes that affect spermatozoa motility, and could promptsperm capacitation through an increased induction of tyrosine phosphorylation, therefore, inducing the acrosome reaction. Meanwhile, Murdica et al. [8] revealed the negative modulator of sperm function glycodelin as over-represented in semen exosomes isolated from asthenozoospermic patients by proteomics analysis.

Long noncoding RNAs (lncRNAs) are a group of nonprotein-coding RNAs with a length longer than 200 nucleotides that distributed in the genome broadly [9]. Accumulating evidence suggests that lncRNAs regulate gene

expression in the form of RNA in epigenetic regulation, regulation of transcription and post-transcriptional regulation levels [10]. The regulatory and structural functions of lncRNAs have been reported to play pivotal roles in a broad scope of biological processes, and disorderly regulation of lncRNAs leads to diverse human diseases [11]. Recent discovery of lncRNAs as critical regulators in normal and disease development provides new clues for delineating the molecular regulation in male germ-cell development [12]. Necsulea et al. [13] performed a large-scale evolutionary study of lncRNA repertoires and expression patterns, in 11 tetrapod species and found the potential functions for lncRNAs in spermatogenesis processes. Wen et al. [14] revealed that rapidly evolving testis-specific lncRNAs play critical roles in late *Drosophila* spermatogenesis. Wichman et al. [15] found that dysregulation of specific lncRNAs led to sperm counts or infertility reduced in mice. Recently, Zhang et al. [16] explored the expression profiles and characteristics of human lncRNAs in normal and asthenozoospermia sperm indicating an association between lncRNAs expression and sperm motility. However, the expression and characteristics of lncRNAs in seminal plasma exosomes of normal and asthenozoospermia have not been addressed.

Therefore, to investigate the intricate regulatory network associated with asthenozoospermia, we performed RNA-sequencing and analyzed the differentially expressed genes (DEGs), differentially expressed lncRNAs (DELncRNAs) and differentially expressed messenger RNAs (DEmRNAs) and new lncRNAs between normal and asthenozoospermia groups with bioinformatics in the present study. Subsequently, we predicted the biological function of the DEGs using Gene Ontology (GO) and the Kyoto Encyclopedia of Genes and Genomes (KEGG) pathway and DO (Disease Ontology) enrichment analyses. In addition, we constructed co-expression networks of the lncRNA-miRNA-mRNA with specific bioinformatics approaches to search the hub lncRNAs in the development of asthenozoospermia. To confirm sequencing results with five of the identified DELncRNAs, we performed quantitative reverse-transcription polymerase chain reaction (qRT-PCR) between normal ( $n=20$ ) and asthenozoospermia ( $n=20$ ) groups.

## Materials and methods

### Sample collection

We selected 25 male sterility diagnosed with asthenozoospermia and 25 male normal healthy individuals at the First Affiliated Hospital of Hainan Medical College. The semen samples (8 ml) were collected by masturbation into a sterile container after 3–7 days of abstinence. We used a sperm quality analyzer to assess the semen basic parameters, including morphology, concentration, motility, viability and counts of spermatozoa. According to the World Health Organization (WHO, 2010, Fifth Edition) standards on the diagnostic criteria of asthenozoospermia, the rapid forward progressive motile sperm (grade A <25%) and total progressive motile sperm (grades A + B <50%) in fresh ejaculation [17]. The semen samples were considered normal with the following parameters: sperm concentration  $\geq 15 \times 10^6/\text{ml}$ , semen volumes  $\geq 1.5$  ml, pH  $\geq 7.2$ , progressive motility (PR)  $\geq 32\%$ , PR + Non-progressive motility (NP)  $\geq 40\%$ . The age range of asthenozoospermia patients and normal healthy controls was 24–48 years old. Control subjects with underlying diseases or abnormal sperm parameters were excluded from the study. All the participants are ethnic Han Chinese with no genetic relationship. Patients with congenital or hereditary disease that cause gonadal dysplasia were excluded from the study. Patients with genitourinary infections, endocrine diseases such as diabetes and hyperthyroidism, severe heart, liver, kidney or other functional abnormalities were also excluded.

### Isolation and identification of exosomes

The semen samples were allowed to liquefy for 30 min at 37°C, 5% CO<sub>2</sub> incubator. Then, semen samples were centrifuged at  $1000 \times g$  for 10 min to separate seminal plasma containing exosomes. Subsequently, the each seminal plasma sample was transferred to a 15 ml centrifuge tube, and was centrifuged at  $300 \times g$  for 10 min,  $2000 \times g$  for 20 min at 4°C, respectively. We discard the precipitate and remove the cells. Then, supernatants were in turn centrifuged at  $10,000 \times g$  for 30 min. We discard the precipitate and remove subcellular components. The remaining supernatants were centrifuged at  $10,000 \times g$  for 60 min. We discard the supernatant, and the resulting precipitate is the seminal plasma exosomes. Exosome-containing pellets were re-suspended with 30 ml PBS, followed by centrifugation at  $10,000 \times g$  for 60min. The Precipitator-purified exosomes were suspended with 1 ml PBS. Then, samples were loaded separately into the eppendorf tube and stored in a  $-80^\circ\text{C}$  refrigerator for future use. The morphological characteristics were observed by transmission electron microscopy (H-7650, Hitachi Limited, Japan) according to the manufacturer's instructions.

**Table 3 GO enrichment analysis of up- and down-regulated DEGs (top 5)**

| Ontology | Up-regulated DEGs |                                                                                       |        |          |       | Down-regulated DEGs |                                                                     |        |          |          |
|----------|-------------------|---------------------------------------------------------------------------------------|--------|----------|-------|---------------------|---------------------------------------------------------------------|--------|----------|----------|
|          | ID                | Description                                                                           | Counts | P-value  | FDR   | ID                  | Description                                                         | Counts | P-value  | FDR      |
| BP       | GO:0000280        | Nuclear division                                                                      | 48     | 1.63E-06 | 0.005 | GO:0006614          | SRP-dependent cotranslational protein targeting to membrane         | 25     | 1.19E-09 | 1.96E-06 |
|          | GO:0048285        | Organelle fission                                                                     | 51     | 1.93E-06 | 0.005 | GO:0070972          | Protein localization to endoplasmic reticulum                       | 30     | 1.20E-09 | 1.96E-06 |
|          | GO:0140014        | Mitotic nuclear division                                                              | 32     | 8.24E-05 | 0.135 | GO:0072599          | Establishment of protein localization to endoplasmic reticulum      | 27     | 1.31E-09 | 1.96E-06 |
|          | GO:0051321        | Meiotic cell cycle                                                                    | 28     | 3.52E-04 | 0.330 | GO:0090150          | Establishment of protein localization to membrane                   | 48     | 1.90E-09 | 1.96E-06 |
|          | GO:0090305        | Nucleic acid phosphodiester bond hydrolysis                                           | 31     | 4.21E-04 | 0.330 | GO:0000184          | Nuclear-transcribed mRNA catabolic process, nonsense-mediated decay | 27     | 1.94E-09 | 1.96E-06 |
| CC       | GO:0000800        | Lateral element                                                                       | 5      | 4.73E-04 | 0.293 | GO:0022626          | Cytosolic ribosome                                                  | 24     | 3.44E-08 | 2.18E-05 |
|          | GO:0043186        | P granule                                                                             | 5      | 0.002    | 0.293 | GO:0044391          | Ribosomal subunit                                                   | 32     | 6.96E-08 | 2.21E-05 |
|          | GO:0045495        | Pole plasm                                                                            | 5      | 0.002    | 0.293 | GO:0005840          | Ribosome                                                            | 38     | 1.19E-07 | 2.52E-05 |
|          | GO:0060293        | Germ plasm                                                                            | 5      | 0.002    | 0.293 | GO:0070382          | Exocytic vesicle                                                    | 29     | 6.55E-06 | 0.001    |
|          | GO:0033391        | Chromatoid body                                                                       | 4      | 0.005    | 0.469 | GO:0008021          | Synaptic vesicle                                                    | 26     | 2.73E-05 | 0.003    |
| MF       | GO:0043015        | Gamma-tubulin binding                                                                 | 7      | 0.001    | 0.259 | GO:0003735          | Structural constituent of ribosome                                  | 29     | 1.88E-06 | 0.002    |
|          | GO:0015926        | Glucosidase activity                                                                  | 5      | 0.001    | 0.259 | GO:0019843          | rRNA binding                                                        | 12     | 0.001    | 0.215    |
|          | GO:0004518        | Nuclease activity                                                                     | 23     | 0.001    | 0.355 | GO:0022838          | Substrate-specific channel activity                                 | 45     | 0.001    | 0.215    |
|          | GO:0016646        | Oxidoreductase activity, acting on the CH-NH group of donors, NAD or NADP as acceptor | 5      | 0.002    | 0.438 | GO:0015267          | Channel activity                                                    | 46     | 0.002    | 0.215    |
|          | GO:0019842        | Vitamin binding                                                                       | 17     | 0.003    | 0.438 | GO:0022803          | Passive transmembrane transporter activity                          | 46     | 0.002    | 0.215    |

Abbreviations: BP, biological process; CC, cellular component; DEG, differentially expressed gene; FDR, false-discovery rate; GO, Gene Ontology; MF, molecular function.  
P<0.05 was considered statistically significant.

## Western blot

Western blot was used to detect exosome-specific antigen molecules CD63 and CD81. We used the reducing Laemmli buffer to dissolve the seminal plasma exosomes (5 µg) and boiled for 5 min at 95°C. Proteins were resolved in a 10% sodium dodecyl sulfate-polyacrylamide gel (SDS-PAGE), followed by being transferred to a PVDF membrane. The membranes were blocked in 5% skimmed milk in PBS containing 0.5% Tween-20 at room temperature for 1 h prior to being probed with the anti-CD63 (1:20,000, #556019; BD Pharmingen), anti-CD81 (1:5,000, #555675; BD Pharmingen) at 4°C overnight. After washing with T-TBS, membranes followed by being incubated with the appropriate horseradish peroxidase-labeled secondary antibody (goat anti-mouse (1: 10,000) or anti-rabbit (1: 2000) immunoglobulin G) for 45 min. The enhanced chemiluminescence (ECL) reagent (Advansta, Menlo Park, CA, U.S.A.) was used to detect the positive immunoreactive bands.

Table 4 KEGG pathway enrichment analysis of up- and down-regulated DEGs (top 10)

| Up-regulated DEGs |                                        |        |         |       | Down-regulated DEGs |                                           |        |          |          |
|-------------------|----------------------------------------|--------|---------|-------|---------------------|-------------------------------------------|--------|----------|----------|
| ID                | Description                            | Counts | P-value | FDR   | ID                  | Description                               | Counts | P-value  | FDR      |
| hsa00510          | N-Glycan biosynthesis                  | 8      | 0.004   | 0.832 | hsa03010            | Ribosome                                  | 27     | 2.44E-07 | 7.09E-05 |
| hsa00830          | Retinol metabolism                     | 9      | 0.007   | 0.832 | hsa05030            | Cocaine addiction                         | 9      | 0.003    | 0.378    |
| hsa03020          | RNA polymerase                         | 5      | 0.015   | 0.832 | hsa04970            | Salivary secretion                        | 12     | 0.007    | 0.528    |
| hsa00760          | Nicotinate and nicotinamide metabolism | 5      | 0.017   | 0.832 | hsa05031            | Amphetamine addiction                     | 10     | 0.007    | 0.528    |
| hsa03460          | Fanconi anemia pathway                 | 7      | 0.017   | 0.832 | hsa05202            | Transcriptional misregulation in cancer   | 19     | 0.017    | 0.968    |
| hsa05321          | Inflammatory bowel disease             | 8      | 0.018   | 0.832 | hsa04960            | Aldosterone-regulated sodium reabsorption | 6      | 0.024    | 0.999    |
| hsa05162          | Measles                                | 13     | 0.022   | 0.832 | hsa04216            | Ferroptosis                               | 6      | 0.034    | 0.999    |
| hsa04657          | IL-17 signaling pathway                | 10     | 0.025   | 0.832 | hsa05414            | Dilated cardiomyopathy                    | 10     | 0.042    | 0.999    |
| hsa05222          | Small cell lung cancer                 | 10     | 0.025   | 0.832 | hsa05034            | Alcoholism                                | 17     | 0.044    | 0.999    |
| hsa00240          | Pyrimidine metabolism                  | 7      | 0.030   | 0.900 | hsa04137            | Mitophagy - animal                        | 8      | 0.044    | 0.999    |

Abbreviations: DEG, differentially expressed genes; FDR, false-discovery rate; KEGG, Kyoto Encyclopedia of Genes and Genomes.  $P < 0.05$  was considered statistically significant.

RNA isolation, library preparation and sequencing analysis

LncRNA-sequencing was performed by the Bioacme Biotechnology Co., Ltd. (Wuhan, China). Briefly, total RNA was extracted with Trizol reagent (Invitrogen, Carlsbad, CA, U.S.A.) from the exosomes of asthenozoospermia patients and normal healthy controls. Total RNA was quantified using a spectrophotometer (NanoDrop 2000; Thermo Fisher Scientific, Waltham, MA, U.S.A.) according to manufacturers' instructions. We used the Agilent 2100 system and an RNA Nano 6000 Assay kit (Agilent Technologies, Santa Clara, CA, U.S.A.) to assess RNA integrity. The ribosomal RNA (rRNA) was removed using Ribo-Zero rRNA removal beads (Illumina, Inc., San Diego, CA, U.S.A.), fragmentation (the average segment length is approximately 200 nt), to enable accurate lncRNA analysis. The extracted total RNA was reverse transcribed into single-stranded complementary DNA (cDNA), then synthesized into a double-stranded cDNA, terminal repair, 3' terminal addition, ligation, and addition of primers, PCR amplification and purification, and quality inspection of the library. The generated libraries were sequenced on an Illumina HiSeq 3000 (Illumina Inc, San Diego, CA) with PE150 according to the manufacturer's protocol. Subsequently, data analyses were performed *in silico*.

Data processing and quality control

The htseq-count software was used to calculate the gene expression, and the alignment of the mass below 10 in the bam file were excluded, and the obtained gene expression count matrix was used as the downstream analysis data. The raw count data were filtered based on the filter criteria that the counts per million (CPM) was greater than 1. The filtered data were standardized using the R software DESeq2 package. All samples were quality controlled based on standardized data to eliminate outlier samples. We used principal component analysis (PCA) to evaluate inter-sample relationships.

DEGs analysis

We used the R software DESeq2 package to analyze the differences in gene's expression levels between the asthenozoospermia group and the normal control group. Genes with  $P$  value  $\leq 0.05$  and the  $\log_2$  fold change (FC) absolute value  $\geq 1$  were considered differentially expressed.

Enrichment analysis

The GO and KEGG and DO enrichment analyses were applied to determine the functional roles and related pathways of DEGs using the clusterProfiler package in R [18]. The GO analysis (<http://www.geneontology.org>) is a functional analysis associating DEGs with the GO biological process (BP), cellular component (CC) and molecular function (MF) categories [19]. We make the GO function annotations for DEGs and explore the biological significance of each gene. The KEGG database (<http://www.genome.jp/kegg/>) includes biochemical reactions, signaling pathways, metabolic pathways and biological processes. KEGG pathway analysis to identify signaling pathways associated with



DEGs. The DO (<http://disease-ontology.org>) analysis was used for the identification of DEG-disease associations [20]. *P* values < 0.05 were considered significantly enriched by the DEGs.

## Association analysis lncRNA and mRNA expression

DElncRNAs and DE mRNA were identified through fold change filtering. The correlation between the expression levels of each DElncRNAs and DEMRNAs was calculated using the Pearson's correlation test. The correlation coefficient was greater than 0.8 and *P* value less than 0.05 were defined as the DElncRNA–DE mRNA pairs coexpressed. In addition, we performed GO and KEGG enrichment analyses of DElncRNA co-expressing differential genes.

## Target gene prediction

To identify the targeted genes of DElncRNAs, we used the bedtools software to search the nearby coding genes of DElncRNAs and excluded the gene with a distance of more than 100 kilobases upstream or downstream of DElncRNAs. Simultaneously, we took genes that intersect with the co-expressed DEGs with DElncRNAs. These obtained DEGs were defined as the cis-regulated target genes.

## lncRNA–miRNA–mRNA regulatory networks

We used hypergeometric distribution to test whether a DEG target microRNA (miRNA) set was enriched on lncRNA target miRNA set, and *P* value less than 0.05 was considered statistically significant. Accordingly, a co-expression regulatory network representing the possible lncRNA–miRNA–mRNA interaction between key lncRNA and target mRNA/miRNA was established by Cytoscape software (version 3.7.1).

## New lncRNAs prediction

Each sample was assembled separately using Stringtie software, then all sample transcripts were combined using the Stringtie merges command, and then the combined results were compared with known gene models using gffcompare software to discover new transcript information. Moreover, new transcripts with lengths greater than 200 for coding potential identification were screened using the LGC software (<http://bigd.big.ac.cn/lgc>). Abnormal samples Z1, Z4, R2 were excluded, and we used the R software DESeq2 package for differential analysis to screen differential expression of new lncRNAs.

## qRT-PCR validation of lncRNAs

Trizol reagent (Invitrogen, Carlsbad, CA, U.S.A.) was used to extract RNA from the exosomes of asthenozoospermia patients (*n*=20) and normal healthy controls (*n*=20) according to the manufacturer's instructions. RNA was reverse transcribed to cDNA using the Reverse Transcription Kit (Takara Co., Ltd., Dalian, China). The quantitative reverse-transcription polymerase chain reaction (qRT-PCR) was performed using the Applied Biosystems 7900HT system (Applied Biosystems) with an SYBR Premix Ex Taq™ kit (Takara Bio, Inc.) according to the manufacturer's instructions. The primers were designed using Primer BLAST (<https://www.ncbi.nlm.nih.gov/tools/primer-blast/>) (Supplementary Table S1) and synthesized by Sangon Biotech Co., Ltd. (Shanghai, China). The lncRNA expression level was verified by qRT-PCR using GAPDH as the reference gene with the  $2^{-\Delta\Delta CT}$  method. Each sample was run as three replicates and qPCR experiments were repeated at least three times (*n*=3).

## Statistical analysis

Statistical analysis was carried out using the SPSS13.0 software (IBM Corp, Armonk, NY). The significant differences in expression levels between asthenozoospermia patients and normal healthy controls groups were tested using a two-tailed Student's *t* test. The significance of the GO terms or enrichment of pathway identifiers in the DEGs was evaluated using the Fisher's exact test. A value of *P* less than 0.05 was considered statistically significant.

## Results

The basic characteristics and sperm parameters of case and control are summarized in Table 1. A total of 50 subjects were recruited in the case–control study, including 25 patients (mean age  $\pm$  standard deviation (SD):  $32.8 \pm 6.53$  and  $35.0 \pm 6.22$ ) and 25 controls (mean age  $\pm$  SD:  $32.4 \pm 5.32$  and  $34.7 \pm 5.38$ ). There were no statistically significant differences between case and control group with regarded to age, BMI, smoking and drinking distribution (*P*>0.05). The sperm parameters, including sperm volume, sperm density, PR, IM, and sperm activity rate are significantly different between the case group and the control group (*P*>0.05).

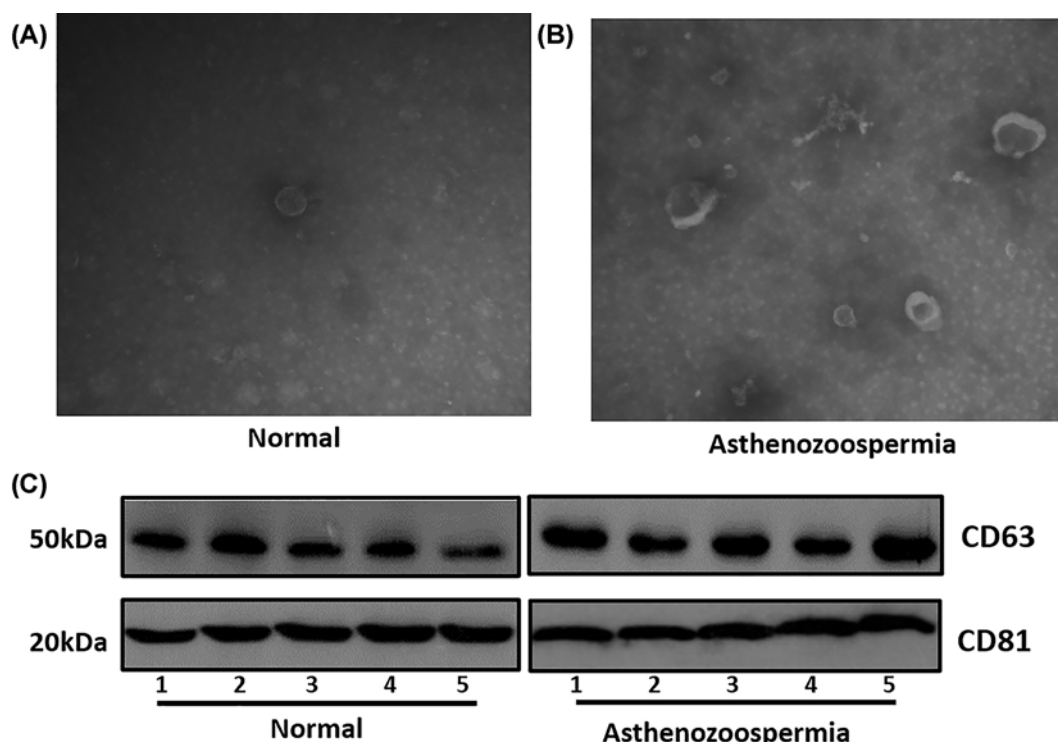

**Figure 1. The Characterization of seminal plasma exosomes**

(A) Transmission electron microscope image of exosomes in normal. (B) Transmission electron microscope image of asthenozoospermia. (C) Western blotting demonstrating the expression of CD63, and CD81 in normal and asthenozoospermia group.

The characterization of exosomes from human seminal plasma was shown in Figure 1. The translucent electron microscope observation results showed that the vesicles derived from normal and asthenozoospermia men displayed similar shape and size, and the ranged of vesicles from 50 to 150 nm, with most of them <100 nm in both groups (Figure 1A,B). To further characterize the vesicles, we used the Western blot to detect the exosome-specific antigen molecules CD63 and CD81 (Figure 1C). The analysis results indicated that all samples expressed these markers, and the total protein content has no significant differences between normal and asthenozoospermia groups.

We used the R software DESeq2 package to analyze the differences in gene's expression levels between asthenozoospermia and normal groups. A total of 4228 significantly DEGs, containing 2344 up-regulated DEGs and 1884 down-regulated DEGs, in asthenozoospermia group compared with normal group were obtained by  $|\log_2FC| \geq 1$  and  $P\text{-value} \leq 0.05$  (Supplementary Table S2). Top 10 significantly up-regulated and top 10 significantly down-regulated DEGs (asthenozoospermia vs. normal group) were displayed in Table 2. Volcano plots and heatmaps of DEGs between asthenozoospermia and normal groups were displayed in Figure 2A,B.

To explore the potential functions of these DEGs, GO and KEGG pathway and DO enrichment analyses were applied with the down-regulated and up-regulated DEGs, separately. Through the GO analysis of DEGs, the up-regulated DEGs were found to be mostly enriched as follows: protein localization to endoplasmic reticulum and establishment of protein localization to membrane ribosome (BP), ribosome and ribosomal subunit (CC), channel activity and passive transmembrane transporter activity (MF) in the top 5 GO enriched terms (Figure 3A and Table 3); the down-regulated DEGs were found to be mostly enriched as follows: nuclear division and organelle fission (BP), lateral element and P granule (CC) and nuclease activity and vitamin binding (MF) in the top 5 GO enriched terms (Figure 3B and Table 3). KEGG pathway analysis revealed that the up-regulated DEGs were mainly associated with ribosome, transcriptional misregulation in cancer, alcoholism, cocaine addiction and ferroptosis in the top 10 KEGG pathways enriched (Figure 3C and Table 4). In addition, the down-regulated DEGs exhibited a strong association with inflammatory and metabolism pathways, according to KEGG pathway analysis (Figure 3D and Table 4). Through the DO analysis, we found that the up-regulated DEGs were significantly enriched among cancers (Figure 3E and Table 5), while the down-regulated DEGs were associated with reproductive system disease, retinal degeneration and mycosis in the top 10 DO enriched (Figure 3F and Table 5).

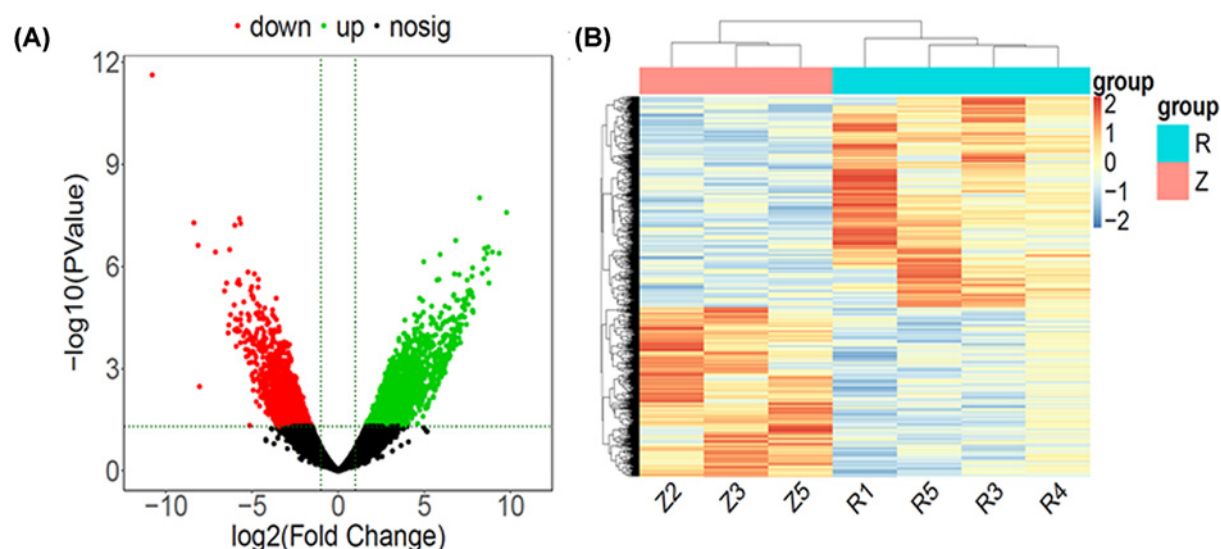

**Figure 2.** Differentially expressed genes between asthenozoospermia infertility and normal groups

(A) Volcano plot of DEGs between asthenozoospermia infertility and normal groups. Black dots represent genes that are not significantly differentially expressed. Green and red dots indicate significant up-regulated and down-regulated genes ( $|\log_2$  fold change  $\geq 1.0$  and  $P$  value  $\leq 0.05$ ), respectively. (B) Heatmap of DEGs between asthenozoospermia infertility and normal groups. Row and column were used to represent DEGs and samples. R: asthenozoospermia infertility; Z: normal. The color scale represented the expression levels of DEGs.

**Table 5** DO enrichment analysis of up- and down-regulated DEGs (top 10)

| Up-regulated DEGs |                                           |        |         |       | Down-regulated DEGs |                                                       |        |         |       |
|-------------------|-------------------------------------------|--------|---------|-------|---------------------|-------------------------------------------------------|--------|---------|-------|
| ID                | Description                               | Counts | P-value | FDR   | ID                  | Description                                           | Counts | P-value | FDR   |
| DOID:15           | Reproductive system disease               | 36     | 0.000   | 0.148 | DOID:11396          | Pulmonary edema                                       | 4      | 0.005   | 1.000 |
| DOID:8466         | Retinal degeneration                      | 26     | 0.001   | 0.148 | DOID:3095           | Germ cell and embryonal cancer                        | 5      | 0.005   | 1.000 |
| DOID:229          | Female reproductive system disease        | 21     | 0.001   | 0.148 | DOID:11119          | Gilles de la Tourette syndrome                        | 4      | 0.012   | 1.000 |
| DOID:10871        | Age-related macular degeneration          | 10     | 0.003   | 0.315 | DOID:2769           | Tic disorder                                          | 4      | 0.015   | 1.000 |
| DOID:2007         | Degeneration of macula and posterior pole | 10     | 0.003   | 0.315 | DOID:1319           | Brain cancer                                          | 7      | 0.020   | 1.000 |
| DOID:2473         | Opportunistic mycosis                     | 7      | 0.003   | 0.315 | DOID:10283          | Prostate cancer                                       | 38     | 0.022   | 1.000 |
| DOID:4448         | Macular degeneration                      | 10     | 0.003   | 0.333 | DOID:2151           | Malignant ovarian surface epithelial-stromal neoplasm | 28     | 0.023   | 1.000 |
| DOID:0050136      | Systemic mycosis                          | 7      | 0.004   | 0.373 | DOID:2152           | Ovary epithelial cancer                               | 28     | 0.023   | 1.000 |
| DOID:0080008      | Ischemic bone disease                     | 7      | 0.009   | 0.503 | DOID:4001           | Ovarian carcinoma                                     | 28     | 0.023   | 1.000 |
| DOID:11116        | Pertussis                                 | 6      | 0.009   | 0.503 | DOID:3307           | Teratoma                                              | 3      | 0.025   | 1.000 |

Abbreviations: DEG, differentially expressed gene; DO, Disease Ontology; FDR, false-discovery rate.  $P < 0.05$  was considered statistically significant.



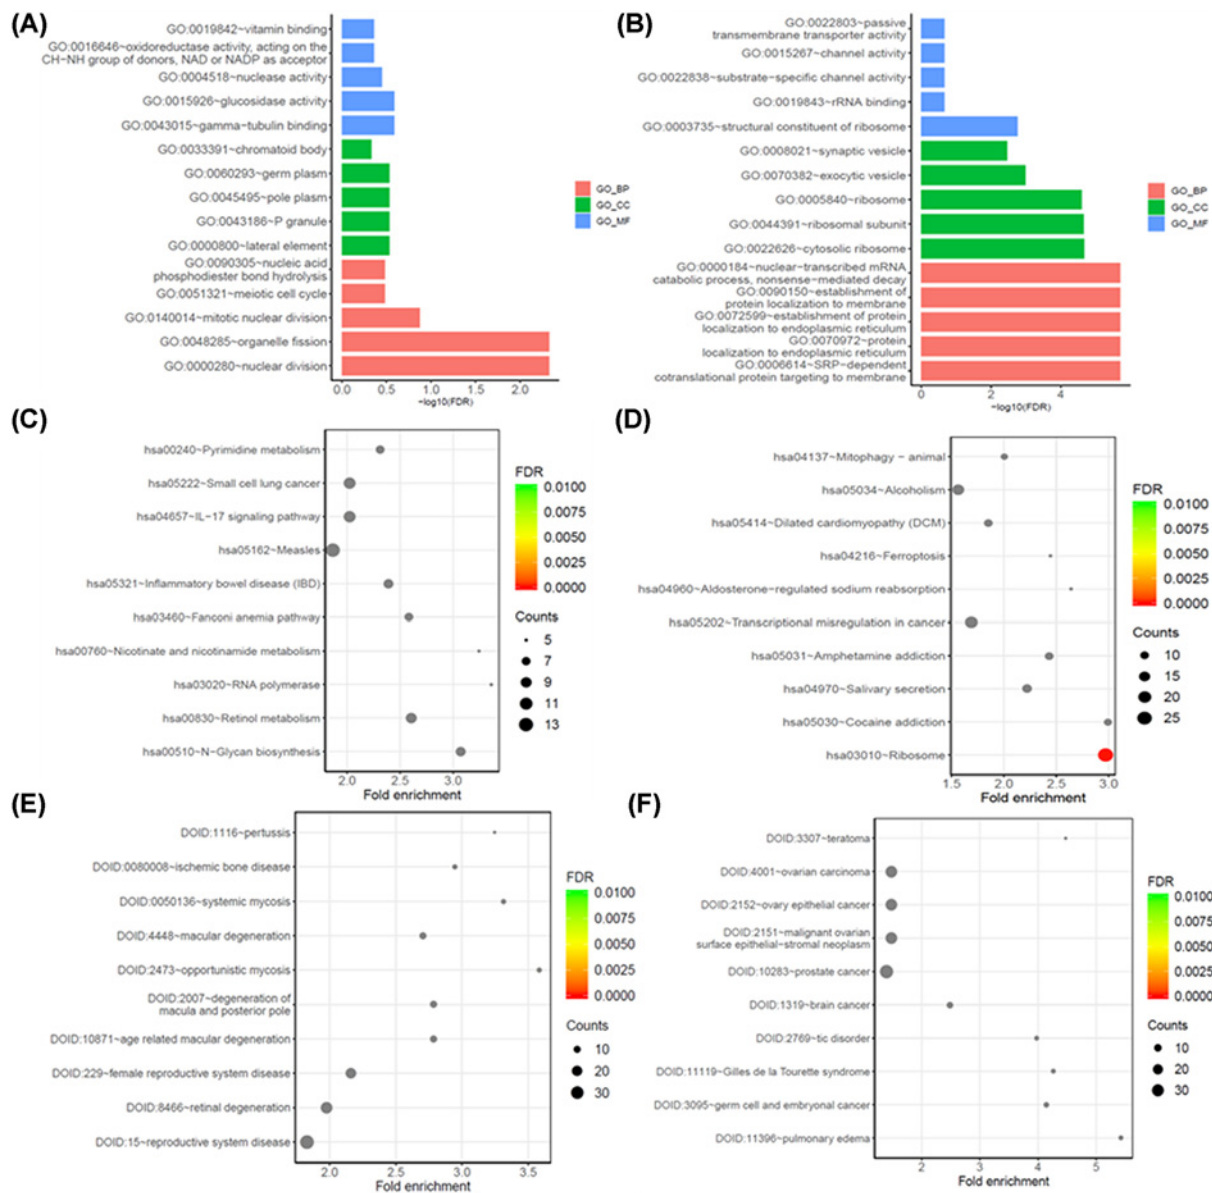

**Figure 3. Enrichment analyses of differentially expressed genes**

(A and B) Top 5 GO enriched terms for the up-regulated and down-regulated differentially expressed genes, respectively. (C and D) Top 10 KEGG pathways enriched for the up-regulated and down-regulated differentially expressed genes, respectively. (E and F) Top 10 DO enriched for the up-regulated and down-regulated differentially expressed genes, respectively; BP, biological process; CC, cellular component; FDR, false-discovery rate; MF, molecular function.

We compared the lncRNA and mRNA expression levels in the asthenozoospermia group with the normal group from the obtained RNA-sequencing data. In total, 995 DElncRNAs were obtained, including 656 up-regulated lncRNAs and 339 down-regulated lncRNAs in the asthenozoospermia compared with the normal control group (Supplementary Table S3). Top 10 significantly up-regulated and top 10 significantly down-regulated DElncRNAs were displayed in Table 5. The volcano plot and heatmaps for clustering analysis of DElncRNAs between asthenozoospermia and normal groups were displayed in Figure 4A,B, respectively. To investigate possible lncRNA-mRNA interactions, we carried out RNA-sequencing analysis and revealed 2338 DEMRNAs between asthenozoospermia and normal control. Among these, 1128 mRNAs were up-regulated in asthenozoospermia group, whereas 1210 mRNAs were down-regulated (Supplementary Table S4). Top 10 significantly up-regulated and top 10 significantly down-regulated DEMRNAs (asthenozoospermia vs. normal) were displayed in Table 5. The volcano plot and heatmaps for clustering

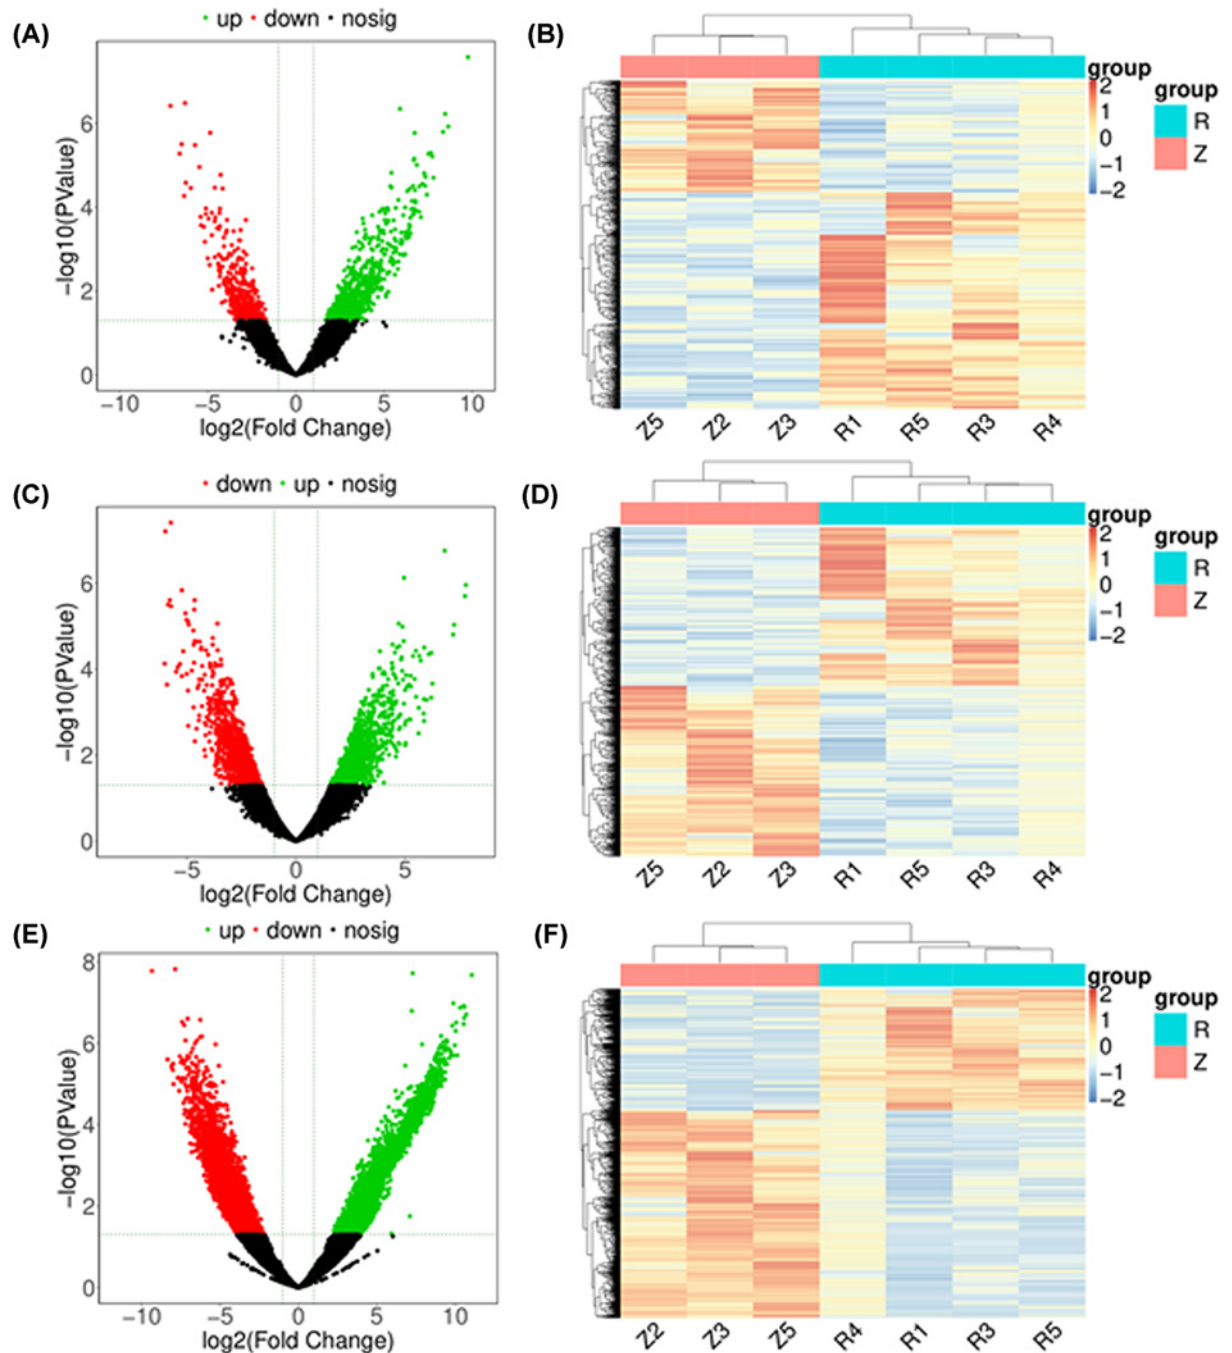

**Figure 4.** Differentially expressed of lncRNAs and mRNAs between asthenozoospermia infertility and normal groups (A and B) Volcano plot and heatmap of DElncRNAs between asthenozoospermia infertility and normal groups. (C and D) Volcano plot and heatmap of DElncRNAs between asthenozoospermia infertility and normal groups. (E and F) Volcano plot and heatmap of novel DElncRNAs between asthenozoospermia infertility and normal groups. Black dots represent genes that are not significantly differentially expressed. Green and red dots indicate significant up-regulated and down-regulated genes ( $|\log_2 \text{fold change}| \geq 1.0$  and  $P \text{ value} \leq 0.05$ ), respectively. Row and column were used to represent DElncRNAs/DEmRNAs and samples. R: asthenozoospermia infertility; Z: normal. The color scale represented the expression levels of DElncRNAs/DEmRNAs.

**Table 6** The differentially expressed lncRNAs, mRNAs and new lncRNAs (top 10)

|               | Symbol       | Up-regulated |          |          | Symbol       | Down-regulated |          |          |
|---------------|--------------|--------------|----------|----------|--------------|----------------|----------|----------|
|               |              | logFC        | P-value  | FDR      |              | logFC          | P-value  | FDR      |
| lncRNAs       | AC009965.1   | 9.768        | 2.61E-08 | 2.12E-04 | AC011444.3   | -7.131         | 3.80E-07 | 0.001    |
|               | PCED1B-AS1   | 5.908        | 4.51E-07 | 0.001    | AC019193.3   | -6.306         | 3.27E-07 | 0.001    |
|               | AL358234.1   | 8.474        | 5.91E-07 | 0.001    | AC068389.1   | -4.871         | 1.67E-06 | 0.002    |
|               | AC121764.1   | 8.651        | 1.19E-06 | 0.001    | AL359771.1   | -6.486         | 3.13E-06 | 0.002    |
|               | AC019117.2   | 8.351        | 1.60E-06 | 0.002    | AC008735.2   | -5.731         | 3.30E-06 | 0.002    |
|               | AC112176.1   | 6.739        | 1.67E-06 | 0.002    | AC009093.4   | -6.599         | 5.26E-06 | 0.003    |
|               | AC022398.1   | 7.654        | 5.01E-06 | 0.003    | LINC02320    | -5.486         | 1.10E-05 | 0.004    |
|               | LSAMP-AS1    | 7.521        | 5.33E-06 | 0.003    | AC022098.1   | -4.276         | 1.67E-05 | 0.006    |
|               | AC025300.1   | 7.738        | 6.08E-06 | 0.003    | AC022098.2   | -6.258         | 2.60E-05 | 0.007    |
|               | LINC02042    | 6.713        | 6.91E-06 | 0.004    | AL513320.1   | -4.602         | 3.38E-05 | 0.008    |
| Total         | 656          |              |          |          | 339          |                |          |          |
| mRNAs         | PIGC         | 6.819        | 1.74E-07 | 0.001    | WFIKK1       | -5.996         | 6.20E-08 | 2.16E-04 |
|               | C9orf72      | 4.956        | 7.47E-07 | 0.001    | HES6         | -5.739         | 3.88E-08 | 2.16E-04 |
|               | PPP1R42      | 7.797        | 1.09E-06 | 0.001    | RPLP2        | -5.240         | 1.46E-06 | 0.002    |
|               | KCTD4        | 7.750        | 1.99E-06 | 0.002    | CRYAB        | -4.645         | 2.46E-06 | 0.002    |
|               | SYCP2        | 4.721        | 8.74E-06 | 0.004    | TMEM178A     | -5.783         | 2.48E-06 | 0.002    |
|               | HORMAD1      | 7.258        | 9.28E-06 | 0.004    | GOLGA6L1     | -5.864         | 3.15E-06 | 0.002    |
|               | PRDM5        | 4.890        | 1.03E-05 | 0.004    | HMG1         | -5.732         | 3.41E-06 | 0.002    |
|               | FRG2B        | 7.209        | 1.55E-05 | 0.005    | OBP2B        | -4.662         | 4.11E-06 | 0.003    |
|               | TATDN1       | 4.938        | 2.21E-05 | 0.007    | PSCA         | -5.078         | 5.01E-06 | 0.003    |
|               | HAPLN1       | 4.435        | 2.66E-05 | 0.007    | NEFH         | -5.018         | 7.04E-06 | 0.004    |
| Total         | 1128         |              |          |          | 1210         |                |          |          |
| Novel lncRNAs | MSTRG.187855 | 7.291        | 1.90E-08 | 2.34E-04 | MSTRG.303611 | -7.864         | 1.51E-08 | 2.34E-04 |
|               | MSTRG.33224  | 11.060       | 2.11E-08 | 2.34E-04 | MSTRG.84390  | -9.343         | 1.67E-08 | 2.34E-04 |
|               | MSTRG.160782 | 10.598       | 1.29E-07 | 0.001    | MSTRG.179148 | -7.059         | 2.49E-07 | 0.001    |
|               | MSTRG.222091 | 10.538       | 1.20E-07 | 0.001    | MSTRG.220024 | -6.248         | 2.66E-07 | 0.001    |
|               | MSTRG.282729 | 10.315       | 1.33E-07 | 0.001    | MSTRG.200378 | -7.405         | 2.99E-07 | 0.001    |
|               | MSTRG.85233  | 9.884        | 1.05E-07 | 0.001    | MSTRG.295090 | -7.278         | 3.64E-07 | 0.001    |
|               | MSTRG.313656 | 7.236        | 1.61E-07 | 0.001    | MSTRG.112856 | -6.166         | 6.75E-07 | 0.001    |
|               | MSTRG.171336 | 10.708       | 1.96E-07 | 0.001    | MSTRG.1639   | -6.257         | 6.99E-07 | 0.001    |
|               | MSTRG.261274 | 10.578       | 2.42E-07 | 0.001    | MSTRG.167804 | -6.459         | 8.44E-07 | 0.002    |
|               | MSTRG.257433 | 10.073       | 3.11E-07 | 0.001    | MSTRG.174054 | -7.203         | 8.55E-07 | 0.002    |
| Total         | 4321         |              |          |          | 7385         |                |          |          |

Abbreviations: FC, fold change; FDR, false-discovery rate.

$P < 0.05$  was considered statistically significant (asthenozoospermia vs. normal group).

analysis of DEMRNAs between asthenozoospermia and normal groups were displayed in Figure 4C,D, respectively. Moreover, we found 11,706 novel DELncRNAs (4321 up-regulated and 7385 down-regulated) in asthenozoospermia group compared with the normal group (Supplementary Table S5, Table 6 and Figure 4E,F).

To identify the correlation between DELncRNAs and DEMRNAs, we performed the Pearson's correlation test to calculate the correlation coefficients between lncRNA and mRNAs. The correlation coefficient was greater than 0.8 and  $P$  value less than 0.05 were defined as the DELncRNA-DEM RNA pairs coexpressed. We found 254,981 positive correlations DELncRNA-DEM RNA pairs. Table 7 showed the top 10 positive correlations DELncRNA-DEM RNA pairs.

lncRNA functions by acting on protein-coding genes via cis-acting elements and trans-acting factors. In the present study, to explore how the DELncRNAs may alter sperm function. We predicted the cis- and trans-regulated target genes of DELncRNAs between asthenozoospermia and normal control groups. The closest coding genes to lncRNAs 100 kb upstream and downstream of them were screened, and their associations with lncRNA were analyzed using the Bedtools program. Seven cis-regulated correlation pairs lncRNA-mRNA (IGF2-AS/IGF2, AL139353.2/HEATR5A, AC003102.1/UBTF, AC010247.2/POU2F2, AC005034.3/MRPL19, AL031666.2/ZMYND8, and AFAP1-AS1/AFAP1), as showed in the Table 8 and Figure 5.

**Table 7 Association analysis of DELncRNAs and DEmRNAs (top 10)**

| LncRNA      | Coding gene    | Correlation coefficient | P-value  |
|-------------|----------------|-------------------------|----------|
| AC080013.5  | <i>APC2</i>    | 0.9996                  | 4.47E-09 |
| AC109495.1  | <i>CCDC8</i>   | 0.9996                  | 5.63E-09 |
| AL138916.2  | <i>ZFC3H1</i>  | 0.9996                  | 6.65E-09 |
| AC006116.9  | <i>IL18R1</i>  | 0.9991                  | 5.31E-08 |
| AC005291.2  | <i>ARG1</i>    | 0.9988                  | 1.01E-07 |
| AL132639.2  | <i>ANGPTL7</i> | 0.9984                  | 2.00E-07 |
| AL162497.1  | <i>CDC26</i>   | 0.9982                  | 2.74E-07 |
| ARHGAP5-AS1 | <i>ZBED6</i>   | 0.9980                  | 3.51E-07 |
| AL360270.2  | <i>FAR1</i>    | 0.9980                  | 3.53E-07 |
| AL645728.1  | <i>LAD1</i>    | 0.9980                  | 3.57E-07 |

Abbreviation: DE, differentially expressed

Correlation coefficient >0.8 and  $P < 0.05$  was considered statistically significant.

**Table 8 The cis-regulated target genes of lncRNAs**

| LncRNA     | Gene           | Chromosome | Distance | Correlation coefficient | P-value |
|------------|----------------|------------|----------|-------------------------|---------|
| IGF2-AS    | <i>IGF2</i>    | 11         | 0        | 0.8613                  | 0.013   |
| AL139353.2 | <i>HEATR5A</i> | 14         | -32301   | 0.9185                  | 0.003   |
| AC003102.1 | <i>UBTF</i>    | 17         | -2084    | 0.8036                  | 0.029   |
| AC010247.2 | <i>POU2F2</i>  | 19         | 0        | 0.9086                  | 0.005   |
| AC005034.3 | <i>MRPL19</i>  | 2          | 0        | 0.8355                  | 0.019   |
| AL031666.2 | <i>ZMYND8</i>  | 20         | 0        | 0.8052                  | 0.029   |
| AFAP1-AS1  | <i>AFAP1</i>   | 4          | 4624     | 0.8771                  | 0.010   |

Correlation coefficient >0.8 and  $P < 0.05$  was considered statistically significant.

We used DELncRNA–DEmRNA co-expression data combined with miRNA target relationship information in the starBase database to perform hypergeometric distribution tests to construct the lncRNA–miRNA–mRNA regulatory network (Figure 6). The interaction network included 11 lncRNAs (LINC00893, AC005034.3, COX10-AS1, MIR497HG, LINC00894, AC015813.1, AP000424.1, MIR17HG, LINC00667, LINC00662 and SNHG3), 35 miRNAs and 59 mRNAs (Supplementary Table S6).

To confirm the sequencing and bioinformatics results, two up-regulated (LINC00667 and COX10-AS1) and three down-regulated (LINC00893, MIR497HG and IGF2-AS) lncRNAs in asthenozoospermia group were chosen for qRT-PCR. Consistent with sequencing results, all five lncRNA were found to be differentially expressed in the asthenozoospermia group compared with the normal ( $P < 0.05$ ; Figure 7).

## Discussion

In the present study, we performed an RNA-sequencing analysis between asthenozoospermia and normal group and identified 4228 significantly DEGs (2344 up-regulated and 1884 down-regulated) in seminal plasma exosomes RNA. About 995 known DELncRNAs (656 up-regulated and 339 down-regulated) and 11,706 novel DELncRNAs (4321 up-regulated and 7385 down-regulated) and 2338 DEmRNAs (1128 up-regulated and 1210 down-regulated) were identified in the present study. We used the GO and KEGG pathway and DO enrichment analyses to further understand the potential biological functions of these DEGs. Moreover, the lncRNA–miRNA–mRNA co-expression network was constructed, and the result indicated that some hub lncRNAs and mRNAs were involved in asthenozoospermia. From the co-expression analyses, we identified seven cis regulated correlation pairs lncRNA–mRNA. In addition, five of the DELncRNAs were verified with qRT-PCR to further validate the reliability of the RNA-sequencing results.

Exosomes are 40–180 nm double membrane microvesicles originated from cell membrane, which thought to be involved in intercellular communication by transferring information via small biological molecules (i.e. lipids, proteins, DNA, mRNA and noncoding RNA) [21]. On the membrane surface of exosomes display several markers, including CD9, CD63, CD81, LAMP1 and TSG101 [21,22]. We detect the antigen molecules CD63 and CD81 in the seminal

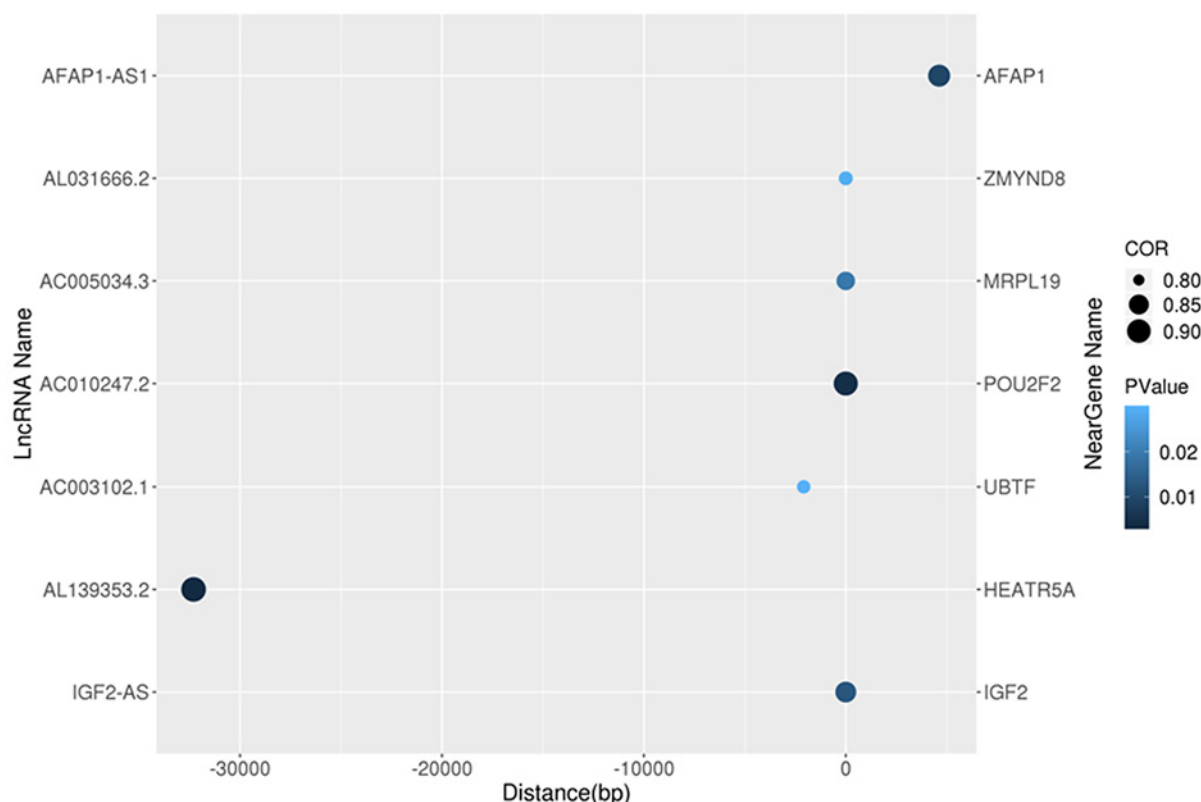

**Figure 5. Association of DElncRNAs and cis-regulated target genes**

The color represents the *P*-value of the correlation analysis. The size of the point represents the magnitude of the correlation coefficient. The horizontal axis is the distance between lncRNA and mRNA.

plasma exosomes using the Western blot. The results indicated that *CD63* and *CD81* expressed in all samples, and the total protein content has no significant differences in asthenozoospermia group compared with the normal group. Previous studies indicated that semen exosomes affect spermatozoa motility and functions [7,8].

lncRNAs can regulate gene expression and are abundant in the genomes of various organisms [23]. lncRNAs are usually more than 200 nucleotides in length and exhibit greater species, tissue, and cell specificity than do shorter-length microRNAs (miRNAs) and messenger RNAs (mRNAs) due to their evolutionary unconserved characteristics [24]. The main functions of lncRNAs include roles in chromatin modification, transcriptional regulation and post-transcriptional regulation. In addition, lncRNAs affect the regulation of mRNA translation and stability largely based on the competitive endogenous RNA (ceRNA) regulation mechanism of binding to miRNA. Increasing evidence indicated that the ceRNA regulatory network of lncRNA–miRNA–mRNA was important in different diseases [25,26]. Accumulating evidence indicates that lncRNAs act as regulators in diverse biological processes and play important roles in many human diseases [27]. Moreover, several lncRNAs were reported to serve as disease biomarkers [28].

Recently, Zhang et al. [16] investigated the expression profiles and characteristics of lncRNAs in normal and asthenozoospermia sperm, and indicated the association between lncRNAs expression and sperm motility. In the present study, we performed an RNA-sequencing analysis of asthenozoospermia patients and normal controls seminal plasma exosomes and identified the DEGs, known DElncRNAs, DEMRNAs, the novel DElncRNAs, DEGs functions and involved pathway, and the ceRNA regulatory network of lncRNA–miRNA–mRNA. Seven cis regulated correlation pairs lncRNA–mRNA were identified in the present study.

Previous studies on the insulin-like growth factor II (*IGF2*) gene are the most widely reported. Spermatozoa is the only source of *IGF2* mRNA since *IGF2* is a paternally inherited gene. Poplinski et al. [29] conclude that low sperm counts were clearly associated with *IGF2/H19* ICR1 hypomethylation, and idiopathic male infertility was strongly associated with imprinting defects at *IGF2/H19* ICR1. Ni et al. [30] indicated that the aberrant methylation of *IGF2* and *KCNQ1* gene may be associated with sperm DNA damage. Tang et al. [31] revealed that miR-210 was involved



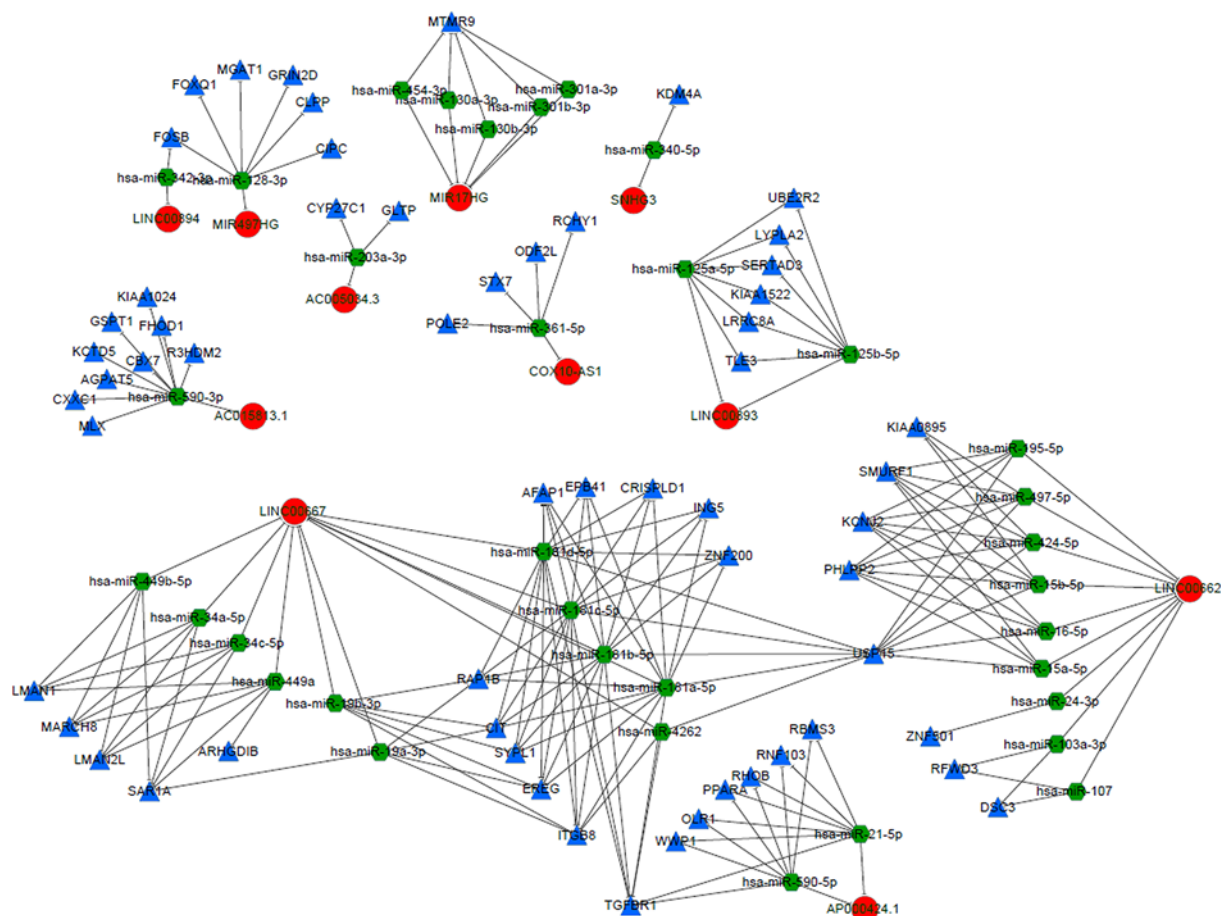

**Figure 6. lncRNA-miRNA-mRNA regulatory networks**

The red circle represents lncRNA, the blue triangle is the co-expressed gene, and the green pentagon represents the miRNA.

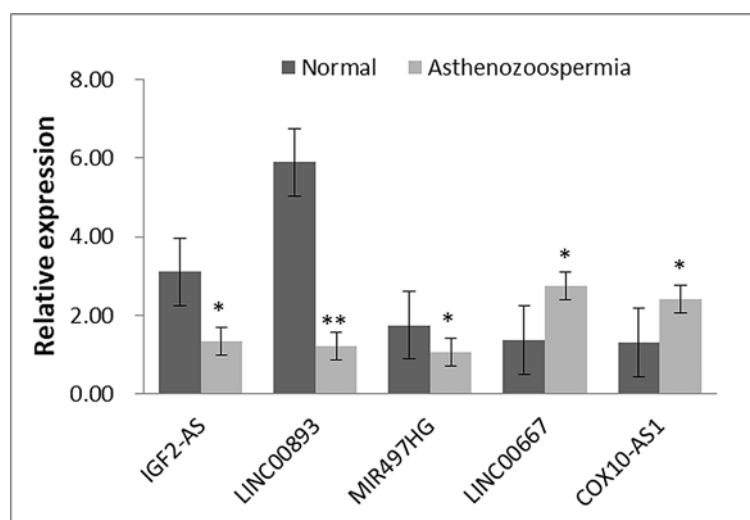

**Figure 7. qRT-PCR analysis of five lncRNAs expression between asthenozoospermia infertility and normal groups (\* $P < 0.05$ ; \*\*  $P < 0.001$ )**

in spermatogenesis by targeting *IGF2* in male infertility. Cannarella et al. [32] found that *IGF2* mRNA was found to be present in human spermatozoa, and their transcription levels were positively correlated with sperm concentration and total sperm count.

It has been reported that OCT2 (octamer binding protein 2, POU2F2) acts as a spermatogonial marker to distinguish the early stages of spermatogenesis [33]. *TLE3*, a transcriptional co-regulator that interacts with DNA-binding factors, plays a role in the development of somatic cells. Lee et al. [34] revealed that *TLE3* is differentially expressed in Sertoli cells and plays a crucial role in regulating cell-specific genes involved in the differentiation and formation of Sertoli cells during testicular development. Huang et al. [35] found that *MGAT1* was expressed at lower levels in mouse all germ-cell types, as well as somatic Sertoli cells. Previous studies showed that conditional deletion of the mouse *Mgat1* gene (*Mgat1* cKO) in spermatogonia causes a germ-cell autonomous defect leading to infertility, and *MGAT1* regulated ERK1/2 signaling during spermatogenesis via different mechanisms [36,37]. The loss of caseinolytic peptidase P (CLPP) leads to infertility in mice [38]. *EPB41* is one of the pleiotropic monogenic disorder's genes that cause male infertility, and manifests as azoospermia [39]. Bao et al. demonstrated that *LRRC8A*-dependent VRAC activity is essential for male germ cell development and fertility [40]. *LRRC8*/VRAC anion channels are required for late stages of spermatid development in mice [41].

In the present study, our results indicated that the *IGF2*, *POU2F2*, *TLE3*, *MGAT1*, *CLPP* and *LRRC8A* were co-expressed with lncRNAs *IGF2-AS*, *AC010247.2*, *LINC00893*, *MIR497HG*, *MIR497HG* and *LINC00893*, respectively. These mRNAs expression levels were down-regulated in the asthenozoospermia group compared with the normal group. The *EPB41* and *ODF2L* were co-expressed with lncRNAs *LINC00667* and *COX10-AS1*, respectively. However, the two genes mRNAs expression levels were up-regulated in the asthenozoospermia group. Moreover, the qRT-PCR analysis confirmed our sequencing results. However, further studies are needed to evaluate the roles of DElncRNAs and DEMRNAs in the molecular mechanism of human asthenozoospermia.

There are some limitations that cannot be ignored in the present study. First, the study sample for RNAsequencing was relatively small, which limited the ability to determine the DElncRNA and DEMRNAs between asthenozoospermia and normal group. Further validation analysis with larger sample size and biological test was needed to confirm our conclusions. Second, the biological function study of significantly different lncRNA, mRNA and miRNA was not performed in our research. Therefore, the biological function analyses are required to provide improved understanding of the roles and mechanisms of DElncRNA and DEMRNAs in the pathogenesis of asthenozoospermia.

In conclusion, we identified key DElncRNA and DEMRNAs between asthenozoospermia and normal group. Furthermore, bioinformatics analysis identified the potential functions of DEgenes and the regulatory network was constructed. Our data provide a bioinformatics analysis of genes and pathways that may be involved in the pathological mechanisms of asthenozoospermia. However, further studies are still required to investigate their mechanisms in the occurrence and development of asthenozoospermia.

## Data Availability

The datasets used and/or analyzed during the current study are available from the corresponding author on reasonable request.

## Competing Interests

The authors declare that there are no competing interests associated with the manuscript.

## Funding

This work is supported by the Hainan Provincial Natural Science Foundation of China [grant number 818QN315]; the Hainan Province Science and Technology Department [grant number ZDKJ2017007]; the Ministry of Science and Technology of China [grant number 2014DFA30180]; and the National Natural Science Foundation of China [grant number 81660433].

## Author Contribution

Yanlin Ma contributed to the design of the study. Hui Lu was responsible for manuscript preparation. Dongchuan Xu and Ping Wang performed the statistical analysis. Wenye Sun and Xinhui Xue performed the experiments. Yuxin Hu and Chunli Xie contributed to collect the samples and data. All authors were responsible for drafting the manuscript, read and approved the final version.

## Ethics Approval

This study was approved by the Institutional Ethical Committee of the First Affiliated Hospital of Hainan Medical College (Approval number: 2018 (Scientific Research) No. (2)). All the experiments were performed in accordance with the principles of the World Medical Association Declaration of Helsinki. Written informed consent was obtained from each subject prior to enrollment.

## Acknowledgements

We are grateful to the patients and control individuals for their participation in the study. We also thank the clinicians and hospital staff that contributed to sample and data collection for this study.

## Abbreviations

DEG, differentially expressed gene; DO, Disease Ontology; FDR, false-discovery rate; GO, Gene Ontology; KEGG, Kyoto Encyclopedia of Genes and Genomes; lncRNA, long noncoding RNA; MF, molecular function; qRT-PCR, quantitative reverse-transcription polymerase chain reaction.

## References

- Katz, D.J., Teloken, P. and Shoshany, O. (2017) Male infertility - The other side of the equation. *Aust. Fam. Physician*. **46**, 641–646
- Curi, S.M., Ariagno, J.I., Chenlo, P.H. et al. (2003) Asthenozoospermia: analysis of a large population. *Arch. Androl.* **49**, 343–349, <https://doi.org/10.1080/01485010390219656>
- Kowal, J., Tkach, M. and Thery, C. (2014) Biogenesis and secretion of exosomes. *Curr. Opin. Cell Biol.* **29**, 116–125, <https://doi.org/10.1016/j.ceb.2014.05.004>
- Yanez-Mo, M., Siljander, P.R., Andreu, Z. et al. (2015) Biological properties of extracellular vesicles and their physiological functions. *J. Extracell. Vesicles* **4**, 27066, <https://doi.org/10.3402/jev.v4.27066>
- Machtinger, R., Laurent, L.C. and Baccarelli, A.A. (2016) Extracellular vesicles: roles in gamete maturation, fertilization and embryo implantation. *Hum. Reprod. Update* **22**, 182–193
- Simon, C., Greening, D.W., Bolumar, D., Balaguer, N., Salamonsen, L.A. and Vilella, F. (2018) Extracellular Vesicles in Human Reproduction in Health and Disease. *Endocr. Rev.* **39**, 292–332, <https://doi.org/10.1210/er.2017-00229>
- Murdica, V., Giacomini, E., Alteri, A. et al. (2019) Seminal plasma of men with severe asthenozoospermia contain exosomes that affect spermatozoa motility and capacitation. *Fert. Ster.* **111**, 897e2–908e2, <https://doi.org/10.1016/j.fertnstert.2019.01.030>
- Murdica, V., Cermisoni, G.C., Zarovni, N., Salonia, A., Viganò, P. and Vago, R. (2019) Proteomic analysis reveals the negative modulator of sperm function glycodefin as over-represented in semen exosomes isolated from asthenozoospermic patients. *Hum. Reprod.* **34**, 1416–1427, <https://doi.org/10.1093/humrep/dez114>
- Bonasio, R. and Shiekhattar, R. (2014) Regulation of transcription by long noncoding RNAs. *Annu. Rev. Genet.* **48**, 433–455, <https://doi.org/10.1146/annurev-genet-120213-092323>
- Sun, Q., Hao, Q. and Prasanth, K.V. (2018) Nuclear Long Noncoding RNAs: Key Regulators of Gene Expression. *Trends Genet.* **34**, 142–157, <https://doi.org/10.1016/j.tig.2017.11.005>
- Schmitz, S.U., Grote, P. and Herrmann, B.G. (2016) Mechanisms of long noncoding RNA function in development and disease. *Cell. Mol. Life Sci.: CMLS* **73**, 2491–2509, <https://doi.org/10.1007/s00018-016-2174-5>
- Luk, A.C., Gao, H., Xiao, S. et al. (2015) GermlincRNA: a unique catalogue of long non-coding RNAs and associated regulations in male germ cell development. *Database: J. Biol. Database. Cur.* **2015**, bav044, <https://doi.org/10.1093/database/bav044>
- Necsulea, A., Soumillon, M., Warnefors, M. et al. (2014) The evolution of lncRNA repertoires and expression patterns in tetrapods. *Nature* **505**, 635–640, <https://doi.org/10.1038/nature12943>
- Wen, K., Yang, L., Xiong, T. et al. (2016) Critical roles of long noncoding RNAs in Drosophila spermatogenesis. *Genome Res.* **26**, 1233–1244, <https://doi.org/10.1101/gr.199547.115>
- Wichman, L., Somasundaram, S., Breindel, C. et al. (2017) Dynamic expression of long noncoding RNAs reveals their potential roles in spermatogenesis and fertility. *Biol. Reprod.* **97**, 313–323, <https://doi.org/10.1093/biolre/iox084>
- Zhang, X., Zhang, P., Song, D. et al. (2019) Expression profiles and characteristics of human lncRNA in normal and asthenozoospermia spermdagger. *Biol. Reprod.* **100**, 982–993, <https://doi.org/10.1093/biolre/iy0253>
- Lu, J.C., Huang, Y.F. and Lu, N.Q. (2010) WHO Laboratory Manual for the Examination and Processing of Human Semen: its applicability to andrology laboratories in China. *Zhonghua Nan Ke Xue* **16**, 867–871
- Yu, G., Wang, L.G., Han, Y. and He, Q.Y. (2012) clusterProfiler: an R package for comparing biological themes among gene clusters. *OMICS* **16**, 284–287, <https://doi.org/10.1089/omi.2011.0118>
- Ashburner, M., Ball, C.A., Blake, J.A. et al. (2000) Gene ontology: tool for the unification of biology. The Gene Ontology Consortium. *Nat Genet.* **25**, 25–29, <https://doi.org/10.1038/75556>
- Schriml, L.M. and Mitraka, E. (2015) The Disease Ontology: fostering interoperability between biological and clinical human disease-related data. *Mamm. Genome* **26**, 584–589, <https://doi.org/10.1007/s00335-015-9576-9>
- Mathivanan, S., Ji, H. and Simpson, R.J. (2010) Exosomes: extracellular organelles important in intercellular communication. *J. Proteomics* **73**, 1907–1920, <https://doi.org/10.1016/j.jprot.2010.06.006>
- Dignat-George, F. and Boulanger, C.M. (2011) The many faces of endothelial microparticles. *Arteriosclerosis Thrombosis Vasc. Biol.* **31**, 27–33, <https://doi.org/10.1161/ATVBAHA.110.218123>
- Ulitisky, I. and Bartel, D.P. (2013) lincRNAs: genomics, evolution, and mechanisms. *Cell* **154**, 26–46, <https://doi.org/10.1016/j.cell.2013.06.020>
- Bai, Y., Long, J., Liu, Z. et al. (2019) Comprehensive analysis of a ceRNA network reveals potential prognostic cytoplasmic lncRNAs involved in HCC progression. *J. Cell. Physiol.* **234**, 18837–18848, <https://doi.org/10.1002/jcp.28522>

- 25 Guo, C.J., Xiao, X., Sheng, L. et al. (2017) RNA Sequencing and Bioinformatics Analysis Implicate the Regulatory Role of a Long Noncoding RNA-mRNA Network in Hepatic Stellate Cell Activation. *Cell. Physiol. Biochem. Int. J. Exp. Cell. Physiol. Biochem. Pharmacol.* **42**, 2030–2042, <https://doi.org/10.1159/000479898>
- 26 Huang, Y. (2018) The novel regulatory role of lncRNA-miRNA-mRNA axis in cardiovascular diseases. *J. Cell. Mol. Med.* **22**, 5768–5775, <https://doi.org/10.1111/jcmm.13866>
- 27 Kopp, F. and Mendell, J.T. (2018) Functional Classification and Experimental Dissection of Long Noncoding RNAs. *Cell* **172**, 393–407, <https://doi.org/10.1016/j.cell.2018.01.011>
- 28 Bolha, L., Ravnik-Glavac, M. and Glavac, D. (2017) Long Noncoding RNAs as Biomarkers in Cancer. *Dis. Markers* **2017**, 7243968, <https://doi.org/10.1155/2017/7243968>
- 29 Poplinski, A., Tuttelmann, F., Kanber, D., Horsthemke, B. and Gromoll, J. (2010) Idiopathic male infertility is strongly associated with aberrant methylation of MEST and IGF2/H19 ICR1. *Int. J. Androl.* **33**, 642–649
- 30 Ni, W., Pan, C., Pan, Q., Fei, Q., Huang, X. and Zhang, C. (2019) Methylation levels of IGF2 and KCNQ1 in spermatozoa from infertile men are associated with sperm DNA damage. *Andrologia* **51**, e13239, <https://doi.org/10.1111/and.13239>
- 31 Tang, D., Huang, Y., Liu, W. and Zhang, X. (2016) Up-Regulation of microRNA-210 is Associated with Spermatogenesis by Targeting IGF2 in Male Infertility. *Med. Sci. Monit.* **22**, 2905–2910, <https://doi.org/10.12659/MSM.897340>
- 32 Cannarella, R., Condorelli, R.A., La Vignera, S. et al. (2019) IGF2 and IGF1R mRNAs Are Detectable in Human Spermatozoa. *World J. Mens Health* **37**, 47, <https://doi.org/10.5534/wjmh.190070>
- 33 Borgers, M., Wolter, M., Hentrich, A., Bergmann, M., Stammler, A. and Konrad, L. (2014) Role of compensatory meiosis mechanisms in human spermatogenesis. *Reproduction* **148**, 315–320, <https://doi.org/10.1530/REP-14-0279>
- 34 Lee, S., Jang, H., Moon, S. et al. (2019) Differential Regulation of TLE3 in Sertoli Cells of the Testes during Postnatal Development. *Cells* **8**, 1156, <https://doi.org/10.3390/cells8101156>
- 35 Huang, H.H., Hassinen, A., Sundaram, S., Spiess, A.N., Kellokumpu, S. and Stanley, P. (2015) GnT1IP-L specifically inhibits MGAT1 in the Golgi via its luminal domain. *eLife* **4**, <https://doi.org/10.7554/eLife.08916>
- 36 Batista, F., Lu, L., Williams, S.A. and Stanley, P. (2012) Complex N-glycans are essential, but core 1 and 2 mucin O-glycans, O-fucose glycans, and NOTCH1 are dispensable, for mammalian spermatogenesis. *Biol. Reprod.* **86**, 179, <https://doi.org/10.1095/biolreprod.111.098103>
- 37 Biswas, B., Batista, F., Sundaram, S. and Stanley, P. (2018) MGAT1 and Complex N-Glycans Regulate ERK Signaling During Spermatogenesis. *Sci. Rep.* **8**, 2022, <https://doi.org/10.1038/s41598-018-20465-3>
- 38 Gispert, S., Parganlija, D., Klinckenberg, M. et al. (2013) Loss of mitochondrial peptidase Clpp leads to infertility, hearing loss plus growth retardation via accumulation of CLPX, mtDNA and inflammatory factors. *Hum. Mol. Genet.* **22**, 4871–4887, <https://doi.org/10.1093/hmg/ddt338>
- 39 Hackstein, J.H., Hochstenbach, R. and Pearson, P.L. (2000) Towards an understanding of the genetics of human male infertility: lessons from flies. *Trends Genet.* **16**, 565–572, [https://doi.org/10.1016/S0168-9525\(00\)02140-5](https://doi.org/10.1016/S0168-9525(00)02140-5)
- 40 Bao, J., Perez, C.J., Kim, J. et al. (2018) Deficient LRRC8A-dependent volume-regulated anion channel activity is associated with male infertility in mice. *JCI Insight* **3**, <https://doi.org/10.1172/jci.insight.99767>
- 41 Luck, J.C., Puchkov, D., Ullrich, F. and Jentsch, T.J. (2018) LRRC8/VRAC anion channels are required for late stages of spermatid development in mice. *J. Biol. Chem.* **293**, 11796–11808, <https://doi.org/10.1074/jbc.RA118.003853>
